# Supplementary material for: A CircRNA–miRNA–mRNA Network for Exploring Doxorubicin- and Myocet-Induced Cardiotoxicity in a Translational Porcine Model
Source: MDPI journal article supplement (doi:10.3390/biom13121711), 2023-11-27
Supplement: s1 [file s1]

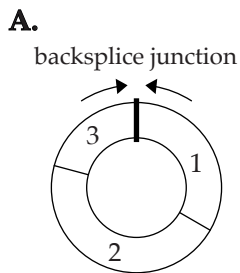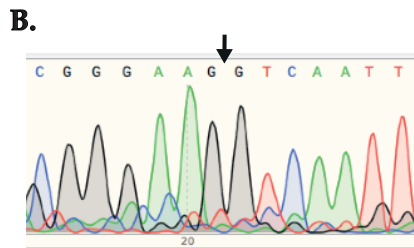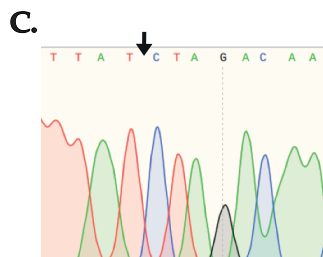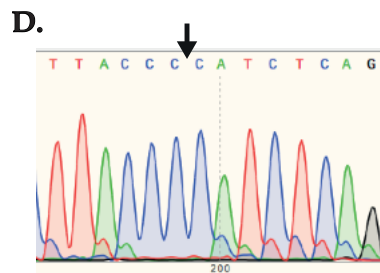

**Supplementary Figure S2.** The presence of backsplice junctions (BSJ) of circRNA in cell culture experiments confirmed using Sanger sequencing.

**A.** CircRNA formation. 1,2 and 3 represent exons, the thick black line represents the backsplice junction, the arrows represent the direction of forward and reverse primers needed for the correct amplification of the BSJ

**B.** Confirmed presence of BSJ in circ-MT:3033 | 3289, the arrow indicates the location of the BSJ

**C.** Confirmed presence of BSJ in circ-MT:3070 | 3478, the arrow indicates the location of the BSJ

**D.** Confirmed presence of BSJ in circ-7:22870230 | 22976632, the arrow indicates the location of the BSJ
