# Supplementary material for: A CircRNA–miRNA–mRNA Network for Exploring Doxorubicin- and Myocet-Induced Cardiotoxicity in a Translational Porcine Model
Source: MDPI journal article supplement (doi:10.3390/biom13121711), 2023-11-27
Supplement: s1 [file s1]

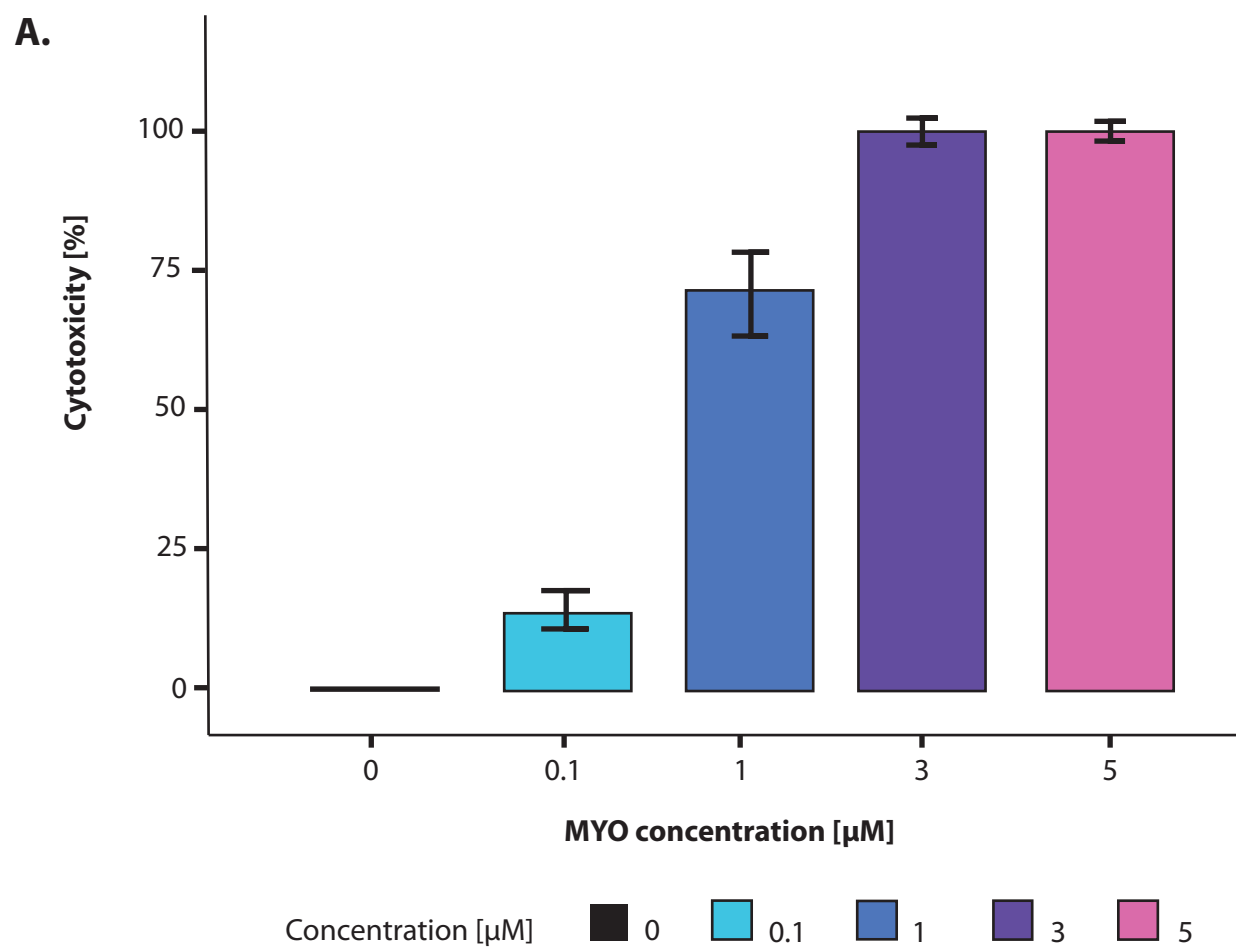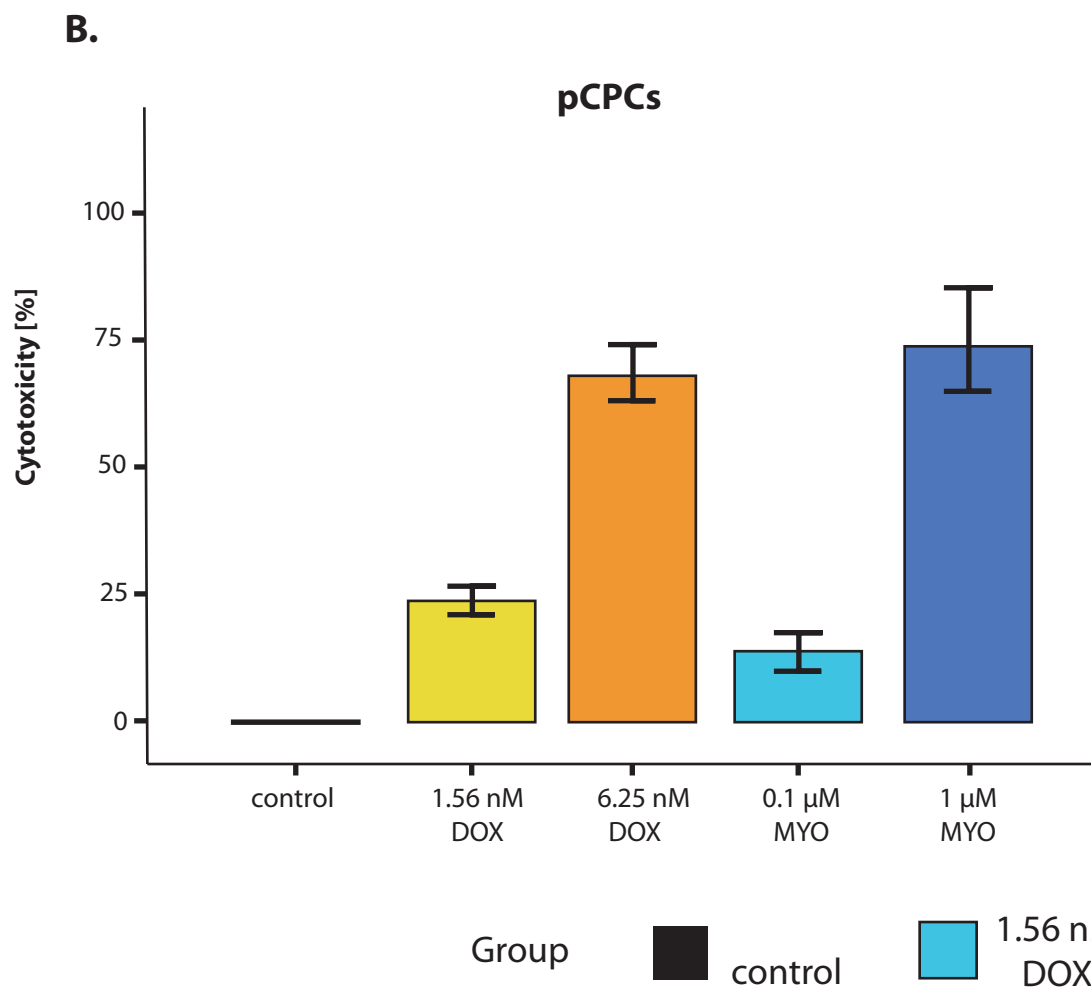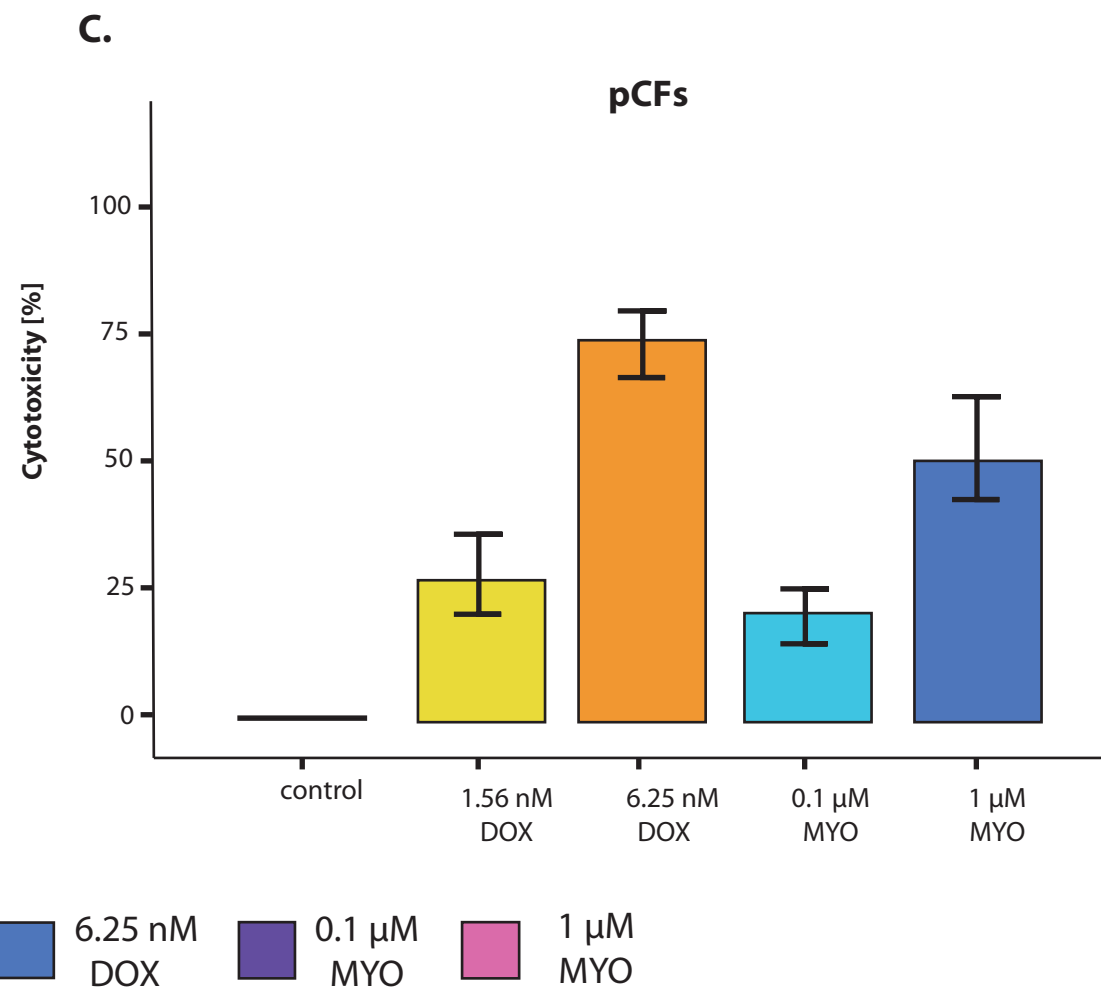

**Supplementary Figure S1** Concentration finding of Doxorubicin and Myocet in pCPCs and pCFs *in vitro* via cytotoxicity assay

**A.** Cytotoxicity (in %) in pCPCs with increasing concentrations of MYO

**B.** Cytotoxicity (in %) in pCPCs with different DOX and MYO concentrations compared to untreated cells (control)

**C.** Cytotoxicity (in %) in pCFs with different DOX and MYO concentrations compared to untreated cells (control)

n = 6 (technical replicates) per group
